# Supplementary material for: Structural, Biochemical and Genetic Characterization of Dissimilatory ATP Sulfurylase from Allochromatium vinosum
Source: PubMed Central journal article supplement (PMC3779200; doi:10.1371/journal.pone.0074707), 2013-09-20
Supplement: pone.0074707.s001.pdf [file pone.0074707.s001.pdf]

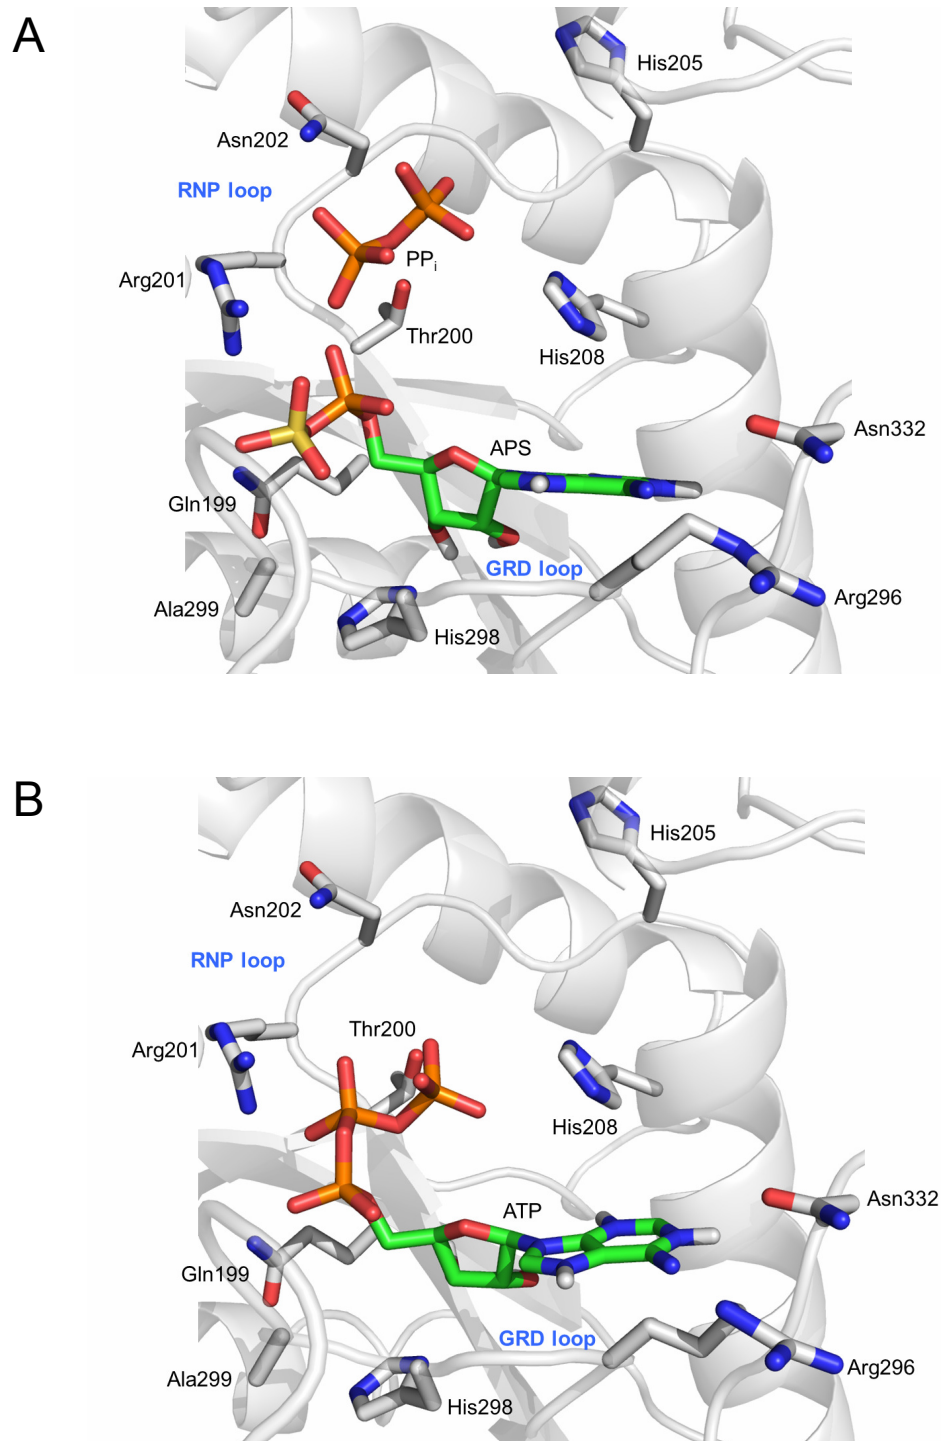

**Fig. S1:** Simulation of the proposed ATPS-APS-PP<sub>i</sub> adduct (A) and ATPS-ATP product (B). The highly conserved <sup>199</sup>QXRNXXHXXH<sup>208</sup> motif is involved in the coordination of the sulfate and phosphate moiety.
