# Supplementary material for: Structural, Biochemical and Genetic Characterization of Dissimilatory ATP Sulfurylase from Allochromatium vinosum
Source: PubMed Central journal article supplement (PMC3779200; doi:10.1371/journal.pone.0074707), 2013-09-20
Supplement: pone.0074707.s002.pdf [file pone.0074707.s002.pdf]

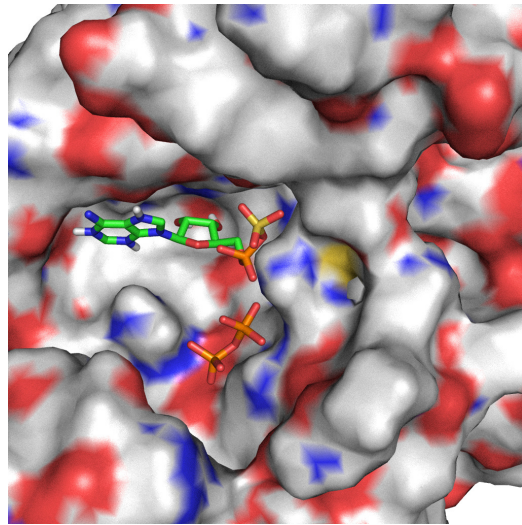

**Fig. S2:** Molecular surface representation with emphasis on the deep cleft within the catalytic domain. The substrate binding pocket is designed to perfectly position APS and PP<sub>i</sub> in adequate proximity. The calculation of the electrostatic potential of the surface using the program APBS (Baker, N. A., Sept. D. et al. (2001). "Electrostatics of nanosystems: application to microtubules and the ribosome." Proc Natl Acad Sci USA 98: 10037-41.) revealed an overall negative potential on the surface (red) and around the substrate binding pocket a positive charge (blue).
