# Supplementary material for: Structural, Biochemical and Genetic Characterization of Dissimilatory ATP Sulfurylase from Allochromatium vinosum
Source: PubMed Central journal article supplement (PMC3779200; doi:10.1371/journal.pone.0074707), 2013-09-20
Supplement: pone.0074707.s003.pdf [file pone.0074707.s003.pdf]

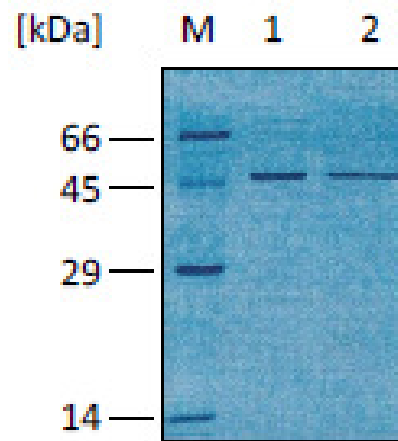

**Fig. S3.** SDS-PAGE (10%) of recombinant *A. vinosum* ATP sulfurylase. The gel was stained with Coomassie brilliant blue. Protein purity was assessed after Nickel-chelate affinity chromatography (lane 1) and subsequent gel filtration chromatography (lane 2). Protein loaded: lane 1, 2  $\mu\text{g}$ ; lane 2, 1  $\mu\text{g}$ .
